# Supplementary material
Source: PubMed Central journal article supplement (PMC10152523)
Supplement: sj-pdf-1-han-10.1177_15589447211030693.pdf [file sj-pdf-1-han-10.1177_15589447211030693.pdf]

Supplemental Table 2. ICD codes for comorbidities

| Comorbidity | ICD-9 CM | ICD-10 CM |
|-------------|----------|-----------|
| Obesity     | 278.0    | -         |
|             | 278.00   | E669      |
|             | 278.01   | E6601     |
|             | 278.02   | E663      |
|             | 278.03   | E662      |
| Diabetes    |          | E119      |
|             |          | E109      |
|             |          | E1165     |
|             | 250.00   | E1065     |
|             | 250.01   | E1169     |
|             | 250.02   | E1010     |
|             | 250.03   | E1165     |
|             | 250.10   | E1101     |
|             | 250.11   | E1069     |
|             | 250.12   | E1100     |
|             | 250.13   | E1164     |
|             | 250.20   | E11641    |
|             | 250.21   | E1011     |
|             | 250.22   | E1064     |
|             | 250.23   | E10641    |
|             | 250.30   | E1129     |
|             | 250.31   | E1029     |
|             | 250.32   | E1121     |
|             | 250.33   | E1021     |
|             | 250.40   | E11311    |
|             | 250.41   | E11319    |
|             | 250.42   | E1136     |
|             | 250.43   | E1139     |
|             | 250.50   | E10311    |
|             | 250.51   | E10319    |
|             | 250.52   | E1036     |
|             | 250.53   | E1039     |
|             | 250.60   | E11311    |
|             | 250.61   | E11319    |
|             | 250.62   | E1140     |
|             | 250.63   | E1040     |
|             | 250.70   | E1151     |
|             | 250.71   | E1051     |
|             | 250.72   | E11618    |
|             | 250.73   | E11620    |
| 250.80      | E11621   |           |
| 250.81      | E11622   |           |
| 250.82      | E11628   |           |
| 250.83      | E11630   |           |
| 250.90      | E11638   |           |
| 250.91      | E11649   |           |
| 250.92      | E1169    |           |
| 250.93      | E10618   |           |
|             | E10620   |           |
|             | E10621   |           |
|             | E10622   |           |

|                         |                                                                                                         |                                                                                                                                                                                                                                                                                                                                                                                                                                       |
|-------------------------|---------------------------------------------------------------------------------------------------------|---------------------------------------------------------------------------------------------------------------------------------------------------------------------------------------------------------------------------------------------------------------------------------------------------------------------------------------------------------------------------------------------------------------------------------------|
|                         |                                                                                                         | E10628<br>E10630<br>E10638<br>E10649<br>E1069<br>E118<br>E108                                                                                                                                                                                                                                                                                                                                                                         |
| History of smoking      | 305.1                                                                                                   | F17200                                                                                                                                                                                                                                                                                                                                                                                                                                |
| Coronary artery disease | 414.00<br>414.01<br>414.02<br>414.03<br>414.04<br>414.05<br>414.06<br>414.07<br>414.2<br>414.3<br>414.4 | I25.10<br>I25.110<br>I25.111<br>I25.118<br>I25.119<br>I25.700<br>I25.701<br>I25.708<br>I25.709<br>I25.710<br>I25.711<br>I25.718<br>I25.719<br>I25.720<br>I25.721<br>I25.728<br>I25.729<br>I25.730<br>I25.731<br>I25.738<br>I25.739<br>I25.750<br>I25.751<br>I25.758<br>I25.759<br>I25.760<br>I25.761<br>I25.768<br>I25.769<br>I25.790<br>I25.791<br>I25.798<br>I25.799<br>I25.810<br>I25.811<br>I25.812<br>I25.82<br>I25.83<br>I25.84 |
| Chronic kidney disease  | 585.1<br>585.2<br>585.3<br>585.4<br>585.5<br>585.6<br>585.9                                             | N18.1<br>N18.2<br>N18.3<br>N18.4<br>N18.5<br>N18.6<br>N18.9                                                                                                                                                                                                                                                                                                                                                                           |
| Chronic anemia          | 280.0<br>280.1                                                                                          | D50.0<br>D50.1                                                                                                                                                                                                                                                                                                                                                                                                                        |

|  |        |        |
|--|--------|--------|
|  | 280.8  | D50.8  |
|  | 280.9  | D50.9  |
|  | 281.1  | D51.1  |
|  | 281.2  | D51.2  |
|  | 285.21 | D51.3  |
|  | 285.22 | D51.8  |
|  | 285.29 | D51.9  |
|  | 285.8  | D52.0  |
|  | 285.9  | D52.1  |
|  |        | D52.8  |
|  |        | D52.9  |
|  |        | D63.0  |
|  |        | D63.1  |
|  |        | D63.8  |
|  |        | D64.4  |
|  |        | D64.89 |
|  |        | D64.9  |
