# Supplementary material
Source: PubMed Central journal article supplement (PMC10152523)
Supplement: sj-pdf-2-han-10.1177_15589447211030693.pdf [file sj-pdf-2-han-10.1177_15589447211030693.pdf]

Supplemental Table 1. ICD codes for non-elective TEA

| <b>Description</b>                                                                        | <b>ICD-9 Code</b> |
|-------------------------------------------------------------------------------------------|-------------------|
| Closed fracture of head of radius                                                         | 81305             |
| Mechanical loosening of prosthetic joint                                                  | 99641             |
| Unspecified mechanical complications of orthopedic device, implant, and graft             | 99640             |
| Broken prosthetic joint                                                                   | 99643             |
| Closed fracture of the olecranon                                                          | 81301             |
| Other mechanical complication of prosthetic joint                                         | 99647             |
| Other complications due to orthopedic device, implant, and graft                          | 99678             |
| Closed fracture of the radius with ulna                                                   | 81308             |
| Infection and inflammatory reaction due to internal joint prosthesis                      | 99666             |
| Malignant neoplasm of scapula and long bones of upper limb                                | 1704              |
| Secondary malignant neoplasm of bone and bone marrow                                      | 1985              |
| Pathologic fracture of humerus                                                            | 73311             |
| Periprosthetic fracture                                                                   | 99644             |
| Mechanical complication of other internal orthopedic device                               | 99649             |
| Fracture of humeral shaft                                                                 | 81221             |
| Dislocated prosthetic joint                                                               | 99642             |
| Multiple myeloma                                                                          | 20300             |
| Osteomyelitis NOS upper arm                                                               | 73022             |
| Forearm deformity NOS                                                                     | 73600             |
| Forearm deformity NEC                                                                     | 73609             |
| Fracture upper end of humerus                                                             | 81200             |
| Colles fracture                                                                           | 81341             |
| Fracture distal radius NEC                                                                | 81342             |
| Sprain ulnar collateral ligament                                                          | 8411              |
| Mechanical complication due to other implant and internal device not elsewhere classified | 99659             |
| Other postoperative infection                                                             | 99859             |
| Malignant neoplasm of connective and soft tissue upper limb                               | 1712              |
| Carpal tunnel syndrome                                                                    | 3540              |
| Ulnar nerve lesion                                                                        | 3542              |
| Pulmonary insufficiency following trauma and surgery                                      | 5185              |
| Localized primary OA of hand                                                              | 71514             |
| Derangement posterior horn lateral meniscus                                               | 71743             |
| Recurrent dislocation upper arm                                                           | 71832             |
| Joint derangement NEC, shoulder                                                           | 71881             |
| Hemarthrosis upper arm                                                                    | 71912             |
| Adhesive capsulitis shoulder                                                              | 7260              |
| Biceps tendon rupture                                                                     | 72762             |
| Major osseous defect                                                                      | 7313              |
| Upper limb anomaly NOS                                                                    | 75550             |

|                                                                                                               |                    |
|---------------------------------------------------------------------------------------------------------------|--------------------|
| Fracture of humerus NOS, closed                                                                               | 81220              |
| Fracture of coronoid process ulna, closed                                                                     | 81302              |
| Fracture of upper ulna NEC/NOS closed                                                                         | 81304              |
| Fracture of radial shaft, closed                                                                              | 81321              |
| Fracture neck of femur NOS, open                                                                              | 8209               |
| Fracture NOS, open                                                                                            | 8291               |
| Dislocated elbow NOS, closed                                                                                  | 83200              |
| Medial dislocated elbow, closed                                                                               | 83203              |
| Sprain shoulder/arm NEC                                                                                       | 8408               |
| Sprain elbow/forearm NEC                                                                                      | 8418               |
| Sprain elbow/forearm NOS                                                                                      | 8419               |
| Articular wear prosthetic joint                                                                               | 99646              |
| Infection and inflammatory reaction due to other internal orthopedic device                                   | 99667              |
| Other complications due to internal joint prosthesis                                                          | 99677              |
| Displaced fracture head of R radius                                                                           | S52121A            |
| <b>Description</b>                                                                                            | <b>ICD-10 code</b> |
| Displaced fracture head of L radius                                                                           | S52.122A           |
| Other specified complication of internal orthopedic prosthetic device, implants and grafts, initial encounter | T84.89XA           |
| Malignant neoplasm of scapula and long bones of R upper limb                                                  | C4.001             |
| Lesion of ulnar nerve right upper limb                                                                        | G5.621             |
| Primary OA right shoulder                                                                                     | M19.011            |
| Other specified acquired deformities, left upper arm                                                          | M21.822            |
| Unspecified fracture of shaft of right humerus, initial encounter open fracture                               | S42.301B           |
| Unspecified fracture of shaft of humerus left arm subsequent encounter with nonunion                          | S42.302K           |
| Displaced fracture of neck of right radius, initial encounter for closed fracture                             | S52.131A           |
| Bartons fracture of right radius, initial encounter for closed fracture                                       | S52.561A           |
| Broken internal prosthetic joint, initial encounter unspecified site                                          | T84.019A           |
| Mechanical loosening of other internal prosthetic joint, initial encounter                                    | T84.038A           |
| Periprosthetic fracture around other internal prosthetic joint, initial encounter                             | T84.048A           |
| Other mechanical complications of other internal prosthetic joint, initial encounter                          | T84.098A           |
| Other mechanical complication of other bone devices, implants and grafts, initial encounter                   | T84.398A           |
| Infection and inflammatory reaction due to internal joint prosthesis, initial encounter                       | T84.59XA           |
| Elbow joint replacement                                                                                       | V43.62             |
| Aftercare following joint replacement                                                                         | V54.81             |
| Acquired absence of other joint                                                                               | V88.29             |
| Presence of right artificial elbow joint                                                                      | Z96.621            |
