# Supplementary material
Source: PubMed Central journal article supplement (PMC10152523)
Supplement: sj-pdf-3-han-10.1177_15589447211030693.pdf [file sj-pdf-3-han-10.1177_15589447211030693.pdf]

Supplemental Table 3. ICD codes for surgical complications

| <b>Surgical complications</b> | <b>ICD-9 Code CM</b>                                                                   | <b>ICD-10 Code CM</b>                                                                                      |
|-------------------------------|----------------------------------------------------------------------------------------|------------------------------------------------------------------------------------------------------------|
| Wound dehiscence              | 998.3<br>998.30<br>998.31<br>998.32<br>998.33                                          | -<br>T8130XA<br>T8132XA<br>T8131XA<br>T8133XA                                                              |
| Wound infection               | 998.5<br>998.51<br>998.59                                                              | -<br>T814XXA<br>T8140XA<br>T8141XA<br>T8142XA<br>T8143XA<br>T8149XA                                        |
| Post-operative shock          | 998.09<br>998.00<br>998.01<br>998.02<br>998.09                                         | T8110XA<br>T8111XA<br>T8112XA<br>T8119XA                                                                   |
| Blood transfusion             | 99.00<br>99.01<br>99.02<br>99.03<br>99.04<br>99.05<br>99.06<br>99.07<br>99.08<br>99.09 | 30233H0<br>30233N0<br>30243H0<br>30243N0<br>30233H1<br>30243H1<br>30233N1<br>30233P1<br>30243N1<br>30243P1 |
