# Supplementary material
Source: PubMed Central journal article supplement (PMC10152523)
Supplement: sj-pdf-4-han-10.1177_15589447211030693.pdf [file sj-pdf-4-han-10.1177_15589447211030693.pdf]

|                               |                                                                                                                                                                                                                          |                                                                                                                                                                                                                                                                          |
|-------------------------------|--------------------------------------------------------------------------------------------------------------------------------------------------------------------------------------------------------------------------|--------------------------------------------------------------------------------------------------------------------------------------------------------------------------------------------------------------------------------------------------------------------------|
|                               | 410.22<br>410.30<br>410.31<br>410.32<br>410.40<br>410.41<br>410.42<br>410.50<br>410.51<br>410.52<br>410.60<br>410.61<br>410.62<br>410.70<br>410.71<br>410.72<br>410.80<br>410.81<br>410.82<br>410.90<br>410.91<br>410.92 | I2119<br>I2111<br>I2111<br>I2111<br>I2119<br>I2119<br>I2119<br>I2129<br>I2129<br>I2129<br>I2129<br>I2129<br>I2129<br>I214<br>I214<br>I214<br>I2129<br>I2129<br>I2129<br>I213<br>I213<br>I213                                                                             |
| Respiratory failure/Pneumonia | 518.81<br>518.82<br>518.4<br>518.51<br>518.52<br>518.85<br>518.84<br>480<br>481<br>482<br>483<br>484<br>485<br>486<br>480.8<br>482.8<br>799.1                                                                            | J9600<br>J9690<br>J810<br>J95821<br>J9600<br>J952<br>J953<br>J9620<br>J120<br>J121<br>J122<br>J1281<br>J1289<br>J129<br>J13<br>J181<br>J150<br>J151<br>J14<br>J154<br>J153<br>J1520<br>J15211<br>J15212<br>J1529<br>J158<br>J155<br>J156<br>A481<br>J159<br>J157<br>J160 |

|                |                                                                                                                                                                                                         |                                                                                                                                                           |
|----------------|---------------------------------------------------------------------------------------------------------------------------------------------------------------------------------------------------------|-----------------------------------------------------------------------------------------------------------------------------------------------------------|
|                |                                                                                                                                                                                                         | J168<br>J17<br>J180<br>J189<br>J1289                                                                                                                      |
| Cardiac arrest | 427.5                                                                                                                                                                                                   | I462<br>I468<br>I469                                                                                                                                      |
| Sepsis         | 038<br>038.0<br>038.1<br>038.2<br>038.4<br>038.8<br>038.9<br>003.1<br>020.2<br>022.3<br>036.2<br>054.5<br>098.89<br>112.5<br>995.91<br>785.50<br>785.51<br>785.52<br>785.59<br>78.59<br>995.92<br>038.9 | A41.9<br>A41.5<br>A41.0<br>A41.1<br>A41.2<br>A41.3<br>A41.4<br>A41.5<br>A41.8<br>A41.9<br>A41.51<br>A41.52<br>A41.53<br>A40<br>T8144XA<br>R65.21<br>R65.2 |
