# Supplementary material
Source: PubMed Central journal article supplement (PMC10152523)
Supplement: sj-pdf-5-han-10.1177_15589447211030693.pdf [file sj-pdf-5-han-10.1177_15589447211030693.pdf]

Supplemental Table 5. Inpatient versus outpatient TEA procedures by year

| Year       | Place     |            | Total |
|------------|-----------|------------|-------|
|            | Inpatient | Outpatient |       |
| 2010       | 75        | 46         | 121   |
| 2011       | 80        | 64         | 144   |
| 2012       | 75        | 48         | 123   |
| 2013       | 81        | 42         | 123   |
| 2014       | 36        | 39         | 75    |
| 2015       | 25        | 27         | 52    |
| 2016       | 29        | 29         | 58    |
| 2017 Q1-Q3 | 13        | 12         | 25    |
